# Supplementary material for: Analysis of bacterial diversity in two oil blocks from two low-permeability reservoirs with high salinities
Source: PubMed Central journal article supplement (PMC4726302; doi:10.1038/srep19600), 2016-01-20
Supplement: srep19600-s1.pdf [file srep19600-s1.pdf]

**Analysis of bacterial diversity in two oil blocks from two low-permeability reservoirs  
with high salinities**

Meng Xiao<sup>1, 2</sup>, Shan-Shan Sun<sup>1\*</sup>, Zhong-Zhi Zhang<sup>1</sup>, Jun-Ming Wang<sup>3</sup>, Long-Wei Qiu<sup>4</sup>, Hua-Yang Sun<sup>2</sup>, Zhao-Zheng Song<sup>1</sup>, Bei-Yu Zhang<sup>3</sup>, De-Li Gao<sup>5</sup>, Guang-Qing Zhang<sup>6</sup>, Wei-Min Wu<sup>7</sup>

<sup>1</sup> State Key Laboratory of Heavy Oil Processing, China University of Petroleum, Beijing, 102249, P.

R. China

<sup>2</sup> College of Chemical Engineering, Qingdao University of Science and Technology, Qingdao, 266042,

P. R. China

<sup>3</sup> Dalian design branch, China Petroleum Engineering & Construction Corporation, Dalian 116011, P.

R. China

<sup>4</sup> School of Geosciences, China University of Petroleum, East China, Qingdao, 266555, P. R. China

<sup>5</sup> College of Petroleum engineering, China University of Petroleum, Beijing, 102249, P. R. China

<sup>6</sup> School of Mechanical, Materials & Mechatronic Engineering, University of Wollongong, Wollongong, NSW2522, Australia

<sup>7</sup> Department of Civil and Environmental Engineering, William & Cloy Codiga Resource Recovery Research Center, Center for Sustainable Development & Global Competitiveness, Stanford University,

Stanford, California, 94305-4020, USA

\* Corresponding author (Email: sssun\_edu@163.com)

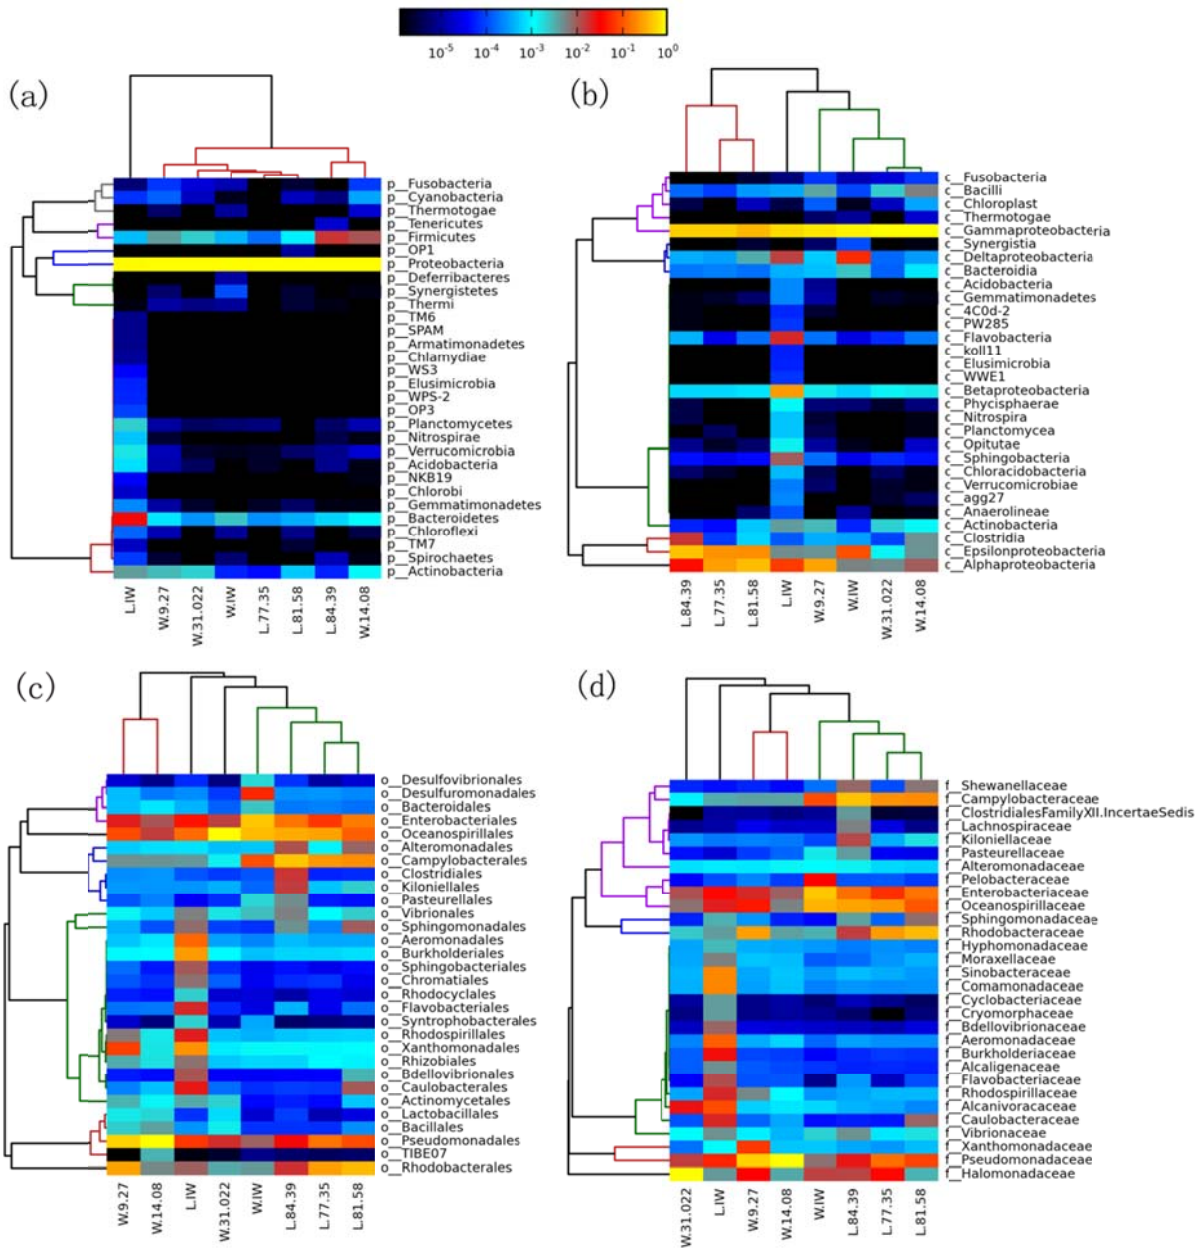

Fig. S1 Phylogenetic analysis of eight formation water samples at different taxonomic levels. Black to yellow color indicates low to high representation of OTUs. a. Cluster graph at phylum level; b. Cluster graph at class level; c. Cluster graph at order level; d. Cluster graph at family level.

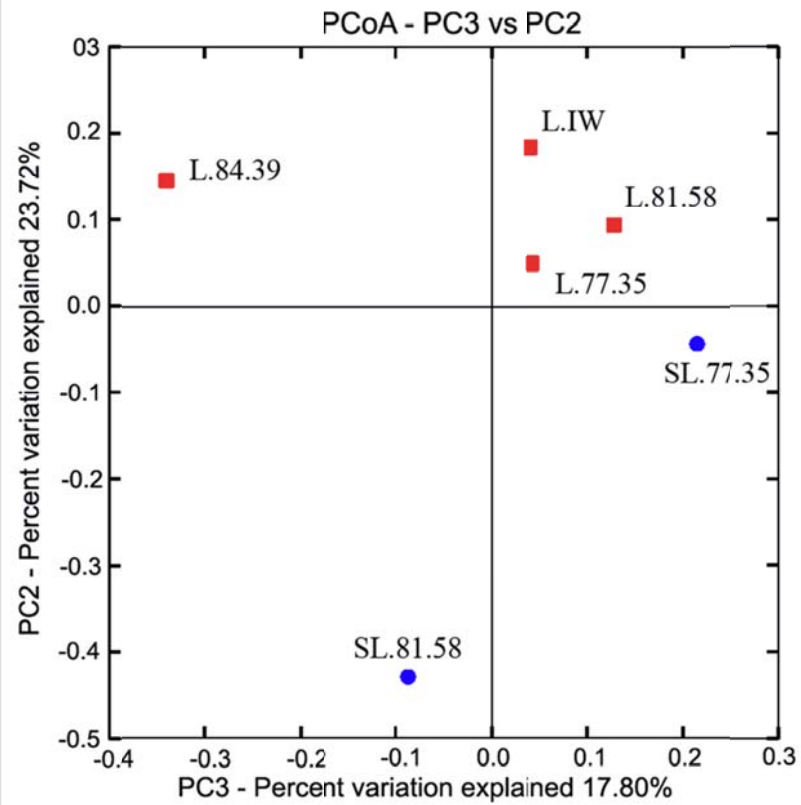

Fig. S2 Beta diversity analysis for the stimulation samples.  
 The red cycles are initial samples without biostimulation; the blue cycles are the stimulated samples.

Table S1 relative abundance of the major species before and after stimulation by adding activator nutrients in sample 77.35 (%)

|                               | L.77.35 | SL.77.35 |
|-------------------------------|---------|----------|
| <i>Agrobacterium</i>          | 0.51    | 25.30    |
| <i>CandidatusAmoebophilus</i> | 0.00    | 18.13    |
| <i>Sphingopyxis</i>           | 0.26    | 17.92    |
| <i>Pseudomonas</i>            | 5.15    | 10.84    |
| <i>Nevskia</i>                | 20.02   | 8.21     |
| <i>Ochrobactrum</i>           | 25.34   | 5.49     |
| <i>Halomonas</i>              | 10.74   | 4.42     |
| <i>Vibrio</i>                 | 1.63    | 3.13     |
| <i>Kangiella</i>              | 2.23    | 2.23     |
| <i>Hydrogenophaga</i>         | 3.35    | 1.77     |
| <i>Shewanella</i>             | 4.47    | 1.04     |
| <i>Serratia</i>               | 4.72    | 0.53     |
| <i>Pannonibacter</i>          | 0.26    | 0.30     |
| <i>Dietzia</i>                | 1.12    | 0.30     |
| <i>Psychrobacter</i>          | 0.69    | 0.15     |
| <i>Bacillus</i>               | 0.09    | 0.06     |
| <i>Methylibium</i>            | 0.09    | 0.06     |
| <i>Phaeospirillum</i>         | 0.00    | 0.04     |
| <i>Methyloversatilis</i>      | 0.09    | 0.04     |
| <i>Propionibacterium</i>      | 0.00    | 0.04     |
| <i>Rhodanobacter</i>          | 0.00    | 0.02     |
| <i>Azorhizobium</i>           | 0.00    | 0.00     |
| <i>Afipia.1</i>               | 0.00    | 0.00     |
| <i>Rhodococcus</i>            | 0.09    | 0.00     |
| <i>Hydrocarboniphaga</i>      | 0.09    | 0.00     |
